# Supplementary material for: (P,C)-cyclometalated complexes derived from naphthyl phosphines: versatile and powerful tools in organometallic chemistry
Source: Royal Society of Chemistry journal article supplement (doi:10.1039/d2cs00564f), 2023-01-01
Supplement: d2cs00564f1.pdf [file d2cs00564f1.pdf]

## (P,C)-Cyclometallated complexes deriving from naphthyl phosphines: versatile and powerful tools in organometallic chemistry

Julien Monot, Enrico Marelli, Blanca Martin-Vaca, Didier Bourissou\*

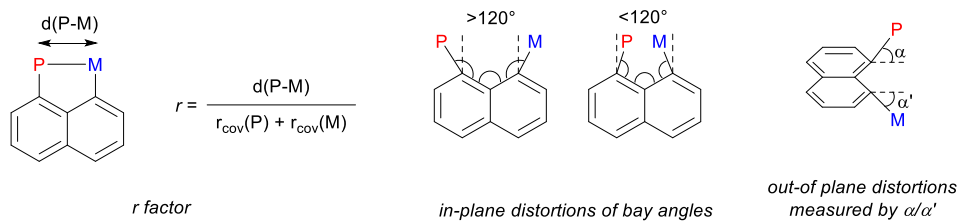

**Table S1.** Selected geometric parameters (Å, °) of the 77 (P,C)-naphthyl cyclometalated complexes deposited in the CCDC database.

|                                       | 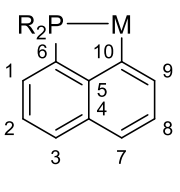 |  |  |  |  |  |  |
|---------------------------------------|-----------------------------------------------------------------------------------|-----------------------------------------------------------------------------------|-----------------------------------------------------------------------------------|------------------------------------------------------------------------------------|-------------------------------------------------------------------------------------|-------------------------------------------------------------------------------------|-------------------------------------------------------------------------------------|
| Reference                             |                                                                                   | 1                                                                                 | 2                                                                                 | 3                                                                                  | 4                                                                                   | 5                                                                                   | 5                                                                                   |
| <b>r factors</b>                      |                                                                                   |                                                                                   |                                                                                   |                                                                                    |                                                                                     |                                                                                     |                                                                                     |
| d(P-M)                                |                                                                                   | 2.418(6)                                                                          | 2.4203                                                                            | 2.1662                                                                             | 2.2485                                                                              | 2.2270                                                                              | 2.2396                                                                              |
| $\Sigma r_{\text{cov}}(\text{P-M})$   |                                                                                   | 2.58                                                                              | 2.58                                                                              | 2.39                                                                               | 2.39                                                                                | 2.39                                                                                | 2.39                                                                                |
| <b>r(P-M)</b>                         |                                                                                   | <b>0.937</b>                                                                      | <b>0.938</b>                                                                      | <b>0.906</b>                                                                       | <b>0.941</b>                                                                        | <b>0.932</b>                                                                        | <b>0.937</b>                                                                        |
| d(M-C10)                              |                                                                                   | 2.215(5)                                                                          | 2.2249                                                                            | 1.9915                                                                             | 2.015                                                                               | 2.0243                                                                              | 2.0058                                                                              |
| $\Sigma r_{\text{cov}}(\text{M-C10})$ |                                                                                   | 2.24                                                                              | 2.24                                                                              | 2.05                                                                               | 2.05                                                                                | 2.05                                                                                | 2.05                                                                                |
| <b>r(M-C10)</b>                       |                                                                                   | <b>0.989</b>                                                                      | <b>0.993</b>                                                                      | <b>0.971</b>                                                                       | <b>0.983</b>                                                                        | <b>0.987</b>                                                                        | <b>0.978</b>                                                                        |
| <b>P-M-C10</b>                        |                                                                                   | 79.48                                                                             | 79.04                                                                             | 84.49                                                                              | 84.05                                                                               | 83.57                                                                               | 83.99                                                                               |
| <b>Bay angles</b>                     |                                                                                   |                                                                                   |                                                                                   |                                                                                    |                                                                                     |                                                                                     |                                                                                     |
| M-C10-C5                              |                                                                                   | 119.48                                                                            | 119.89                                                                            | 119.90                                                                             | 119.97                                                                              | 119.48                                                                              | 120.06                                                                              |
| C5-C6-P                               |                                                                                   | 115.0                                                                             | 114.88                                                                            | 110.90                                                                             | 111.95                                                                              | 110.86                                                                              | 111.46                                                                              |
| <b>Out-of plane distortions</b>       |                                                                                   |                                                                                   |                                                                                   |                                                                                    |                                                                                     |                                                                                     |                                                                                     |
| $\alpha$ (C3-C6-P)                    |                                                                                   | 0.32                                                                              | 3.77                                                                              | 5.39                                                                               | 8.43                                                                                | 8.03                                                                                | 6.56                                                                                |
| $\alpha'$ (C7-C10-M)                  |                                                                                   | 4.70                                                                              | 4.07                                                                              | 1.11                                                                               | 1.99                                                                                | 5.74                                                                                | 5.74                                                                                |

|                                                                                   |                                                                                   |                                                                                   |                                                                                     |                                                                                     |                                                                                     |
|-----------------------------------------------------------------------------------|-----------------------------------------------------------------------------------|-----------------------------------------------------------------------------------|-------------------------------------------------------------------------------------|-------------------------------------------------------------------------------------|-------------------------------------------------------------------------------------|
| 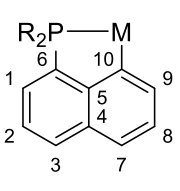 |  |  |  |  |  |
| Reference                                                                         | 5                                                                                 | 5                                                                                 | 6                                                                                   | 6                                                                                   | 6                                                                                   |
| <b>r factors</b>                                                                  |                                                                                   |                                                                                   |                                                                                     |                                                                                     |                                                                                     |
| d(P-M)                                                                            | 2.2068                                                                            | 2.219(1)                                                                          | 2.296(1)                                                                            | 2.2768                                                                              | 2.3030                                                                              |
| $\Sigma r_{\text{cov}}(\text{P-M})$                                               | 2.58                                                                              | 2.39                                                                              | 2.53                                                                                | 2.53                                                                                | 2.53                                                                                |
| <b>r(P-M)</b>                                                                     | <b>0.855</b>                                                                      | <b>0.928</b>                                                                      | <b>0.907</b>                                                                        | <b>0.900</b>                                                                        | <b>0.910</b>                                                                        |
| d(M-C10)                                                                          | 2.0578                                                                            | 2.020(7)                                                                          | 2.084(6)                                                                            | 2.0772                                                                              | 2.0730                                                                              |
| $\Sigma r_{\text{cov}}(\text{M-C10})$                                             | 2.24                                                                              | 2.05                                                                              | 2.19                                                                                | 2.19                                                                                | 2.19                                                                                |
| <b>r(M-C10)</b>                                                                   | <b>0.918</b>                                                                      | <b>0.985</b>                                                                      | <b>0.951</b>                                                                        | <b>0.948</b>                                                                        | <b>0.946</b>                                                                        |
| <b>P-M-C10</b>                                                                    | 84.37                                                                             | 84.00                                                                             | 80.94                                                                               | 80.54                                                                               | 79.97                                                                               |
| <b>Bay angles</b>                                                                 |                                                                                   |                                                                                   |                                                                                     |                                                                                     |                                                                                     |
| M-C10-C5                                                                          | 117.78                                                                            | 118.75                                                                            | 120.95                                                                              | 121.18                                                                              | 122.11                                                                              |
| C5-C6-P                                                                           | 111.31                                                                            | 110.66                                                                            | 111.17                                                                              | 111.20                                                                              | 109.41                                                                              |
| <b>Out-of plane distortions</b>                                                   |                                                                                   |                                                                                   |                                                                                     |                                                                                     |                                                                                     |
| $\alpha(\text{C3-C6-P})$                                                          | 1.12                                                                              | 8.58                                                                              | 2.30                                                                                | 3.99                                                                                | 12.19                                                                               |
| $\alpha'(\text{C7-C10-M})$                                                        | 1.83                                                                              | 5.61                                                                              | 3.95                                                                                | 6.98                                                                                | 1.32                                                                                |

|                                                                                   |                                                                                   |                                                                                   |                                                                                     |                                                                                     |                                                                                     |
|-----------------------------------------------------------------------------------|-----------------------------------------------------------------------------------|-----------------------------------------------------------------------------------|-------------------------------------------------------------------------------------|-------------------------------------------------------------------------------------|-------------------------------------------------------------------------------------|
| 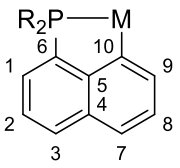 |  |  |  |  |  |
| Reference                                                                         | 6                                                                                 | 7                                                                                 | 8                                                                                   | 8                                                                                   | 8                                                                                   |
| <b>r factors</b>                                                                  |                                                                                   |                                                                                   |                                                                                     |                                                                                     |                                                                                     |
| d(P-M)                                                                            | 2.3328                                                                            | 2.282(3)                                                                          | 2.3060                                                                              | 2.3130                                                                              | 2.3230 2.3280                                                                       |
| $\Sigma r_{\text{cov}}(\text{P-M})$                                               | 2.53                                                                              | 2.53                                                                              | 2.53                                                                                | 2.53                                                                                | 2.53                                                                                |
| <b>r(P-M)</b>                                                                     | <b>0.922</b>                                                                      | <b>0.902</b>                                                                      | <b>0.911</b>                                                                        | <b>0.914</b>                                                                        | <b>0.918 0.920</b>                                                                  |
| d(M-C10)                                                                          | 2.0933                                                                            | 2.094(8)                                                                          | 2.0840                                                                              | 2.0880                                                                              | 2.0650 2.0640                                                                       |
| $\Sigma r_{\text{cov}}(\text{M-C10})$                                             | 2.19                                                                              | 2.19                                                                              | 2.19                                                                                | 2.19                                                                                | 2.19                                                                                |
| <b>r(M-C10)</b>                                                                   | <b>0.956</b>                                                                      | <b>0.956</b>                                                                      | <b>0.951</b>                                                                        | <b>0.953</b>                                                                        | <b>0.943 0.942</b>                                                                  |
| <b>P-M-C10</b>                                                                    | 79.83                                                                             | 80.41                                                                             | 81.24                                                                               | 80.96                                                                               | 80.10 80.31                                                                         |
| <b>Bay angles</b>                                                                 |                                                                                   |                                                                                   |                                                                                     |                                                                                     |                                                                                     |
| M-C10-C5                                                                          | 121.62                                                                            | 121.80                                                                            | 120.61                                                                              | 120.74                                                                              | 120.94 122.15                                                                       |
| C5-C6-P                                                                           | 111.41                                                                            | 111.95                                                                            | 112.85                                                                              | 113.04                                                                              | 111.76 112.02                                                                       |
| <b>Out-of plane distortions</b>                                                   |                                                                                   |                                                                                   |                                                                                     |                                                                                     |                                                                                     |
| $\alpha(\text{C3-C6-P})$                                                          | 6.41                                                                              | 8.23                                                                              | 5.81                                                                                | 7.51                                                                                | 12.61 7.62                                                                          |
| $\alpha'(\text{C7-C10-M})$                                                        | 4.92                                                                              | 3.32                                                                              | 3.50                                                                                | 1.17                                                                                | 1.27 5.18                                                                           |

|                                                                                   |                                                                                   |                                                                                   |                                                                                     |                                                                                     |                                                                                     |
|-----------------------------------------------------------------------------------|-----------------------------------------------------------------------------------|-----------------------------------------------------------------------------------|-------------------------------------------------------------------------------------|-------------------------------------------------------------------------------------|-------------------------------------------------------------------------------------|
| 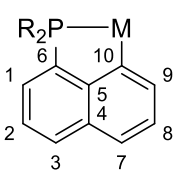 |  |  |  |  |  |
| Reference                                                                         | 9                                                                                 | 9                                                                                 | 10                                                                                  | 10                                                                                  | 10                                                                                  |
| <b>r factors</b>                                                                  |                                                                                   |                                                                                   |                                                                                     |                                                                                     |                                                                                     |
| d(P-M)                                                                            | 2.175(3)                                                                          | 2.1831                                                                            | 2.3748 2.3814                                                                       | 2.330(2)                                                                            | 2.2470(9)                                                                           |
| $\Sigma r_{\text{cov}}(\text{P-M})$                                               | 2.33                                                                              | 2.33                                                                              | 2.49                                                                                | 2.48                                                                                | 2.48                                                                                |
| <b>r(P-M)</b>                                                                     | <b>0.933</b>                                                                      | <b>0.937</b>                                                                      | <b>0.954 0.956</b>                                                                  | <b>0.900</b>                                                                        | <b>0.906</b>                                                                        |
| d(M-C10)                                                                          | 1.996(3)                                                                          | 2.0007                                                                            | 2.0929 2.0616                                                                       | 2.114(6)                                                                            | 2.122(4)                                                                            |
| $\Sigma r_{\text{cov}}(\text{M-C10})$                                             | 1.99                                                                              | 1.99                                                                              | 2.15                                                                                | 2.14                                                                                | 2.14                                                                                |
| <b>r(M-C10)</b>                                                                   | <b>1.003</b>                                                                      | <b>1.00</b>                                                                       | <b>0.973 0.959</b>                                                                  | <b>0.988</b>                                                                        | <b>0.991</b>                                                                        |
| <b>P-M-C10</b>                                                                    | 84.00                                                                             | 83.81                                                                             | 82.85 82.53                                                                         | 82.0(2)                                                                             | 81.4(1)                                                                             |
| <b>Bay angles</b>                                                                 |                                                                                   |                                                                                   |                                                                                     |                                                                                     |                                                                                     |
| M-C10-C5                                                                          | 117.91                                                                            | 118.57                                                                            | 117.68 116.70                                                                       | 120.1(5)                                                                            | 117.9(3)                                                                            |
| C5-C6-P                                                                           | 110.17                                                                            | 111.01                                                                            | 112.80 111.65                                                                       | 113.5(5)                                                                            | 112.0(3)                                                                            |
| <b>Out-of plane distortions</b>                                                   |                                                                                   |                                                                                   |                                                                                     |                                                                                     |                                                                                     |
| $\alpha$ (C3-C6-P)                                                                | 5.69                                                                              | 5.55                                                                              | 6.69                                                                                | 2.33                                                                                | 6.57                                                                                |
| $\alpha'$ (C7-C10-M)                                                              | 11.69                                                                             | 11.43                                                                             | 2.43                                                                                | 1.66                                                                                | 6.69                                                                                |

|                                                                                   |                                                                                   |                                                                                   |                                                                                     |                                                                                     |                                                                                     |
|-----------------------------------------------------------------------------------|-----------------------------------------------------------------------------------|-----------------------------------------------------------------------------------|-------------------------------------------------------------------------------------|-------------------------------------------------------------------------------------|-------------------------------------------------------------------------------------|
| 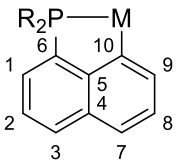 |  |  |  |  |  |
| Reference                                                                         | 11                                                                                | 12                                                                                | 12                                                                                  | 13                                                                                  | 14                                                                                  |
| <b>r factors</b>                                                                  |                                                                                   |                                                                                   |                                                                                     |                                                                                     |                                                                                     |
| d(P-M)                                                                            | 2.223(1)                                                                          | 2.2485                                                                            | 2.3360 2.2814                                                                       | 2.2470                                                                              | 2.1740                                                                              |
| $\Sigma r_{\text{cov}}(\text{P-M})$                                               | 2.48                                                                              | 2.48                                                                              | 2.48                                                                                | 2.48                                                                                | 2.31                                                                                |
| <b>r(P-M)</b>                                                                     | <b>0.896</b>                                                                      | <b>0.906</b>                                                                      | <b>0.942 0.920</b>                                                                  | <b>0.906</b>                                                                        | <b>0.941</b>                                                                        |
| d(M-C10)                                                                          | 2.069(4) 2.045(6)                                                                 | 2.0529                                                                            | 2.07 2.0844                                                                         | 2.1215                                                                              | 1.9690                                                                              |
| $\Sigma r_{\text{cov}}(\text{M-C10})$                                             | 2.14                                                                              | 2.14                                                                              | 2.14                                                                                | 2.14                                                                                | 1.97                                                                                |
| <b>r(M-C10)</b>                                                                   | <b>0.967 0.955</b>                                                                | <b>0.959</b>                                                                      | <b>0.967 0.974</b>                                                                  | <b>0.991</b>                                                                        | <b>0.999</b>                                                                        |
| <b>P-M-C10</b>                                                                    | 80.9(1) 82.3(1)                                                                   | 84.20                                                                             | 83.63 82.76                                                                         | 81.38                                                                               | 85.99                                                                               |
| <b>Bay angles</b>                                                                 |                                                                                   |                                                                                   |                                                                                     |                                                                                     |                                                                                     |
| M-C10-C5                                                                          | 119.8(4) 120.8(4)                                                                 | 119.12                                                                            | 118.68 120                                                                          | 117.85                                                                              | 117.17                                                                              |
| C5-C6-P                                                                           | 109.8(4) 111.3(4)                                                                 | 113.56                                                                            | 113.77 114.77                                                                       | 111.98                                                                              | 109.25                                                                              |
| <b>Out-of plane distortions</b>                                                   |                                                                                   |                                                                                   |                                                                                     |                                                                                     |                                                                                     |
| $\alpha(\text{C3-C6-P})$                                                          | 3.28 11.71                                                                        | 2.48                                                                              | 6.56 1.19                                                                           | 9.36                                                                                | 9.47                                                                                |
| $\alpha'(\text{C7-C10-M})$                                                        | 3.44 4.93                                                                         | 3.15                                                                              | 1.35 1.09                                                                           | 7.85                                                                                | 5.68                                                                                |

|                                                                                   |                                                                                   |                                                                                   |                                                                                    |                                                                                     |                                                                                     |                                                                                     |
|-----------------------------------------------------------------------------------|-----------------------------------------------------------------------------------|-----------------------------------------------------------------------------------|------------------------------------------------------------------------------------|-------------------------------------------------------------------------------------|-------------------------------------------------------------------------------------|-------------------------------------------------------------------------------------|
| 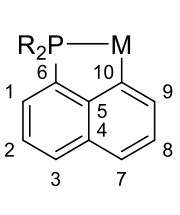 |  |  |  |  |  |  |
| Reference                                                                         | 14                                                                                | 14                                                                                | 14                                                                                 | 15                                                                                  | 15                                                                                  | 15                                                                                  |
| <b>r factors</b>                                                                  |                                                                                   |                                                                                   |                                                                                    |                                                                                     |                                                                                     |                                                                                     |
| d(P-M)                                                                            | 2.1557                                                                            | 2.1639                                                                            | 2.1631                                                                             | 2.286                                                                               | 2.2628 2.2636                                                                       | 2.2531 2.2595                                                                       |
| $\Sigma r_{\text{cov}}(\text{P-M})$                                               | 2.31                                                                              | 2.31                                                                              | 2.31                                                                               | 2.46                                                                                | 2.46                                                                                | 2.46                                                                                |
| <b>r(P-M)</b>                                                                     | <b>0.933</b>                                                                      | <b>0.937</b>                                                                      | <b>0.936</b>                                                                       | <b>0.929</b>                                                                        | <b>0.920 0.920</b>                                                                  | <b>0.916 0.918</b>                                                                  |
| d(M-C10)                                                                          | 1.9278                                                                            | 1.9212                                                                            | 1.9262                                                                             | 2.092                                                                               | 2.0466 2.0391                                                                       | 2.0769 2.0783                                                                       |
| $\Sigma r_{\text{cov}}(\text{M-C10})$                                             | 1.97                                                                              | 1.97                                                                              | 1.97                                                                               | 2.12                                                                                | 2.12                                                                                | 1.12                                                                                |
| <b>r(M-C10)</b>                                                                   | <b>0.978</b>                                                                      | <b>0.975</b>                                                                      | <b>0.978</b>                                                                       | <b>0.987</b>                                                                        | <b>0.965 0.962</b>                                                                  | <b>0.980 0.980</b>                                                                  |
| <b>P-M-C10</b>                                                                    | <b>86.01</b>                                                                      | <b>85.97</b>                                                                      | <b>85.99</b>                                                                       | 83.65                                                                               | 83.23 83.14                                                                         | 82.99 83.49                                                                         |
| <b>Bay angles</b>                                                                 |                                                                                   |                                                                                   |                                                                                    |                                                                                     |                                                                                     |                                                                                     |
| M-C10-C5                                                                          | 118.13                                                                            | 118.15                                                                            | 118.23                                                                             | 118.67                                                                              | 120.01 119.08                                                                       | 119.28 119.06                                                                       |
| C5-C6-P                                                                           | 107.92                                                                            | 105.05                                                                            | 108.00                                                                             | 114.74                                                                              | 112.50 111.77                                                                       | 112.77 113.16                                                                       |
| <b>Out-of plane distortions</b>                                                   |                                                                                   |                                                                                   |                                                                                    |                                                                                     |                                                                                     |                                                                                     |
| $\alpha(\text{C3-C6-P})$                                                          | 1.68                                                                              | 1.63                                                                              | 1.19                                                                               | 3.46                                                                                | 7.29 11.95                                                                          | 3.61 2.56                                                                           |
| $\alpha'(\text{C7-C10-M})$                                                        | 1.12                                                                              | 6.86                                                                              | 6.50                                                                               | 5.63                                                                                | 2.42 5.69                                                                           | 1.26 2.13                                                                           |

|                                 |                     |                     |              |              |                    |                    |
|---------------------------------|---------------------|---------------------|--------------|--------------|--------------------|--------------------|
|                                 |                     |                     |              |              |                    |                    |
| Reference                       | 15                  | 15                  | 16           | 17           | 18                 | 19                 |
| <b>r factors</b>                |                     |                     |              |              |                    |                    |
| d(P-M)                          | 2.2585(5) 2.2596(4) | 2.2546(9) 2.2456(8) | 2.2190       | 2.229        | 2.1937 2.1960      | 2.2180 2.2117      |
| $\Sigma r_{cov}(P-M)$           | 2.46                | 2.46                | 2.46         | 2.46         | 2.46               | 2.46               |
| <b>r(P-M)</b>                   | <b>0.918 0.918</b>  | <b>0.916 0.913</b>  | <b>0.902</b> | <b>0.906</b> | <b>0.891 0.892</b> | <b>0.902 0.899</b> |
| d(M-C10)                        | 2.069(2) 2.070(2)   | 2.027(3) 2.044(3)   | 1.9863       | 2.012        | 1.9888 1.9860      | 1.9843 1.9832      |
| $\Sigma r_{cov}(M-C10)$         | 2.12                | 2.12                | 2.12         | 2.12         | 2.12               | 2.12               |
| <b>r(M-C10)</b>                 | <b>0.976 0.976</b>  | <b>0.956 0.964</b>  | <b>0.937</b> | <b>0.949</b> | <b>0.938 0.937</b> | <b>0.936 0.935</b> |
| <b>P-M-C10</b>                  | 84.17(6) 84.17(6)   | 83.74(8) 83.77(8)   | 83.61        | 83.19        | 83.45 83.48        | 83.01 83.39        |
| <b>Bay angles</b>               |                     |                     |              |              |                    |                    |
| M-C10-C5                        | 118.5(2) 118.5(2)   | 118.8(2) 119.1(2)   | 121.49       | 120.20       | 121.17 121.02      | 119.94 120.07      |
| C5-C6-P                         | 113.6(2) 113.2(2)   | 112.3(2) 112.3(2)   | 110.95       | 111.25       | 109.69 109.92      | 107.00 112.97      |
| <b>Out-of plane distortions</b> |                     |                     |              |              |                    |                    |
| $\alpha$ (C3-C6-P)              | 1.64 2.83           | 3.03 3.42           | 0.23         | 3.37         | 0.37 0.98          | 9.99 10.45         |
| $\alpha'$ (C7-C10-M)            | 2.04 1.91           | 8.42 3.87           | 2.38         | 6.45         | 2.84 0.39          | 6.39 1.29          |



|                                                                                   |                                                                                   |                                                                                   |                                                                                    |                                                                                     |                                                                                     |                                                                                     |
|-----------------------------------------------------------------------------------|-----------------------------------------------------------------------------------|-----------------------------------------------------------------------------------|------------------------------------------------------------------------------------|-------------------------------------------------------------------------------------|-------------------------------------------------------------------------------------|-------------------------------------------------------------------------------------|
| 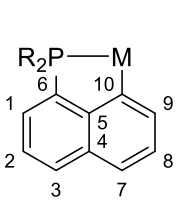 |  |  |  |  |  |  |
| Reference                                                                         | 20                                                                                | 20                                                                                | 21                                                                                 | 10                                                                                  | 22                                                                                  | 23                                                                                  |
| <b>r factors</b>                                                                  |                                                                                   |                                                                                   |                                                                                    |                                                                                     |                                                                                     |                                                                                     |
| d(P-M)                                                                            | 2.2977                                                                            | 2.3033                                                                            | 2.2587                                                                             | 2.2227                                                                              | 2.337                                                                               | 2.2991                                                                              |
| $\Sigma r_{\text{cov}}(\text{P-M})$                                               | 2.46                                                                              | 2.46                                                                              | 2.46                                                                               | 2.46                                                                                | 2.43                                                                                | 2.43                                                                                |
| <b>r(P-M)</b>                                                                     | <b>0.934</b>                                                                      | <b>0.936</b>                                                                      | <b>0.918</b>                                                                       | <b>0.903</b>                                                                        | <b>0.962</b>                                                                        | <b>0.946</b>                                                                        |
| d(M-C10)                                                                          | 2.0821                                                                            | 2.0800                                                                            | 2.0285                                                                             | 2.0038                                                                              | 2.073                                                                               | 2.0358                                                                              |
| $\Sigma r_{\text{cov}}(\text{M-C10})$                                             | 2.12                                                                              | 2.12                                                                              | 2.12                                                                               | 2.12                                                                                | 2.09                                                                                | 2.09                                                                                |
| <b>r(M-C10)</b>                                                                   | <b>0.982</b>                                                                      | <b>0.981</b>                                                                      | <b>0.957</b>                                                                       | <b>0.945</b>                                                                        | <b>0.992</b>                                                                        | <b>0.974</b>                                                                        |
| <b>P-M-C10</b>                                                                    | 82.95                                                                             | 83.16                                                                             | 83.38                                                                              | 84.12                                                                               | 84.59                                                                               | 83.82                                                                               |
| <b>Bay angles</b>                                                                 |                                                                                   |                                                                                   |                                                                                    |                                                                                     |                                                                                     |                                                                                     |
| M-C10-C5                                                                          | 118.58                                                                            | 118.54                                                                            | 119.16                                                                             | 117.70                                                                              | 118.45                                                                              | 119.89                                                                              |
| C5-C6-P                                                                           | 114.49                                                                            | 113.75                                                                            | 112.05                                                                             | 109.23                                                                              | 115.50                                                                              | 113.18                                                                              |
| <b>Out-of plane distortions</b>                                                   |                                                                                   |                                                                                   |                                                                                    |                                                                                     |                                                                                     |                                                                                     |
| $\alpha(\text{C3-C6-P})$                                                          | 1.58                                                                              | 0.94                                                                              | 0.53                                                                               | 1.54                                                                                | 2.95                                                                                | 2.94                                                                                |
| $\alpha'(\text{C7-C10-M})$                                                        | 2.08                                                                              | 1.16                                                                              | 5.77                                                                               | 6.26                                                                                | 1.44                                                                                | 2.88                                                                                |

|                                                                                   |                                                                                   |                                                                                    |                                                                                     |                                                                                     |                                                                                     |
|-----------------------------------------------------------------------------------|-----------------------------------------------------------------------------------|------------------------------------------------------------------------------------|-------------------------------------------------------------------------------------|-------------------------------------------------------------------------------------|-------------------------------------------------------------------------------------|
| 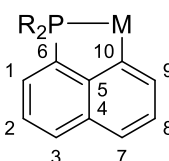 |  |  |  |  |  |
| Reference                                                                         | 24                                                                                | 24                                                                                 | 24                                                                                  | 20                                                                                  | 20                                                                                  |
| <b>r factors</b>                                                                  |                                                                                   |                                                                                    |                                                                                     |                                                                                     |                                                                                     |
| d(P-M)                                                                            | 2.3335                                                                            | 2.3210                                                                             | 2.3122                                                                              | 2.2597                                                                              | 2.2849                                                                              |
| $\Sigma r_{\text{cov}}(\text{P-M})$                                               | 2.43                                                                              | 2.43                                                                               | 2.43                                                                                | 2.43                                                                                | 2.43                                                                                |
| <b>r(P-M)</b>                                                                     | <b>0.960</b>                                                                      | <b>0.955</b>                                                                       | <b>0.951</b>                                                                        | <b>0.930</b>                                                                        | <b>0.940</b>                                                                        |
| d(M-C10)                                                                          | 2.0082                                                                            | 2.0063                                                                             | 2.0106                                                                              | 2.0512                                                                              | 2.0516                                                                              |
| $\Sigma r_{\text{cov}}(\text{M-C10})$                                             | 2.09                                                                              | 2.09                                                                               | 2.09                                                                                | 2.09                                                                                | 2.09                                                                                |
| <b>r(M-C10)</b>                                                                   | <b>0.961</b>                                                                      | <b>0.960</b>                                                                       | <b>0.962</b>                                                                        | <b>0.981</b>                                                                        | <b>0.981</b>                                                                        |
| <b>P-M-C10</b>                                                                    | 82.93                                                                             | 82.61                                                                              | 83.00                                                                               | 83.63                                                                               | 84.07                                                                               |
| <b>Bay angles</b>                                                                 |                                                                                   |                                                                                    |                                                                                     |                                                                                     |                                                                                     |
| M-C10-C5                                                                          | 122.34                                                                            | 120.69                                                                             | 121.73                                                                              | 118.35                                                                              | 117.73                                                                              |
| C5-C6-P                                                                           | 110.61                                                                            | 109.86                                                                             | 111.08                                                                              | 112.65                                                                              | 113.47                                                                              |
| <b>Out-of plane distortions</b>                                                   |                                                                                   |                                                                                    |                                                                                     |                                                                                     |                                                                                     |
| $\alpha(\text{C3-C6-P})$                                                          | 7.88                                                                              | 11.62                                                                              | 5.67                                                                                | 3.55                                                                                | 3.32 1.24                                                                           |
| $\alpha'(\text{C7-C10-M})$                                                        | 3.62                                                                              | 4.11                                                                               | 2.76                                                                                | 2.05                                                                                | 1.28 2.80                                                                           |

|                                                                                   |                                                                                   |                                                                                    |                                                                                     |                                                                                     |                                                                                     |
|-----------------------------------------------------------------------------------|-----------------------------------------------------------------------------------|------------------------------------------------------------------------------------|-------------------------------------------------------------------------------------|-------------------------------------------------------------------------------------|-------------------------------------------------------------------------------------|
| 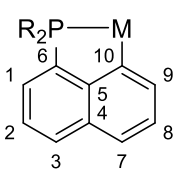 |  |  |  |  |  |
| Reference                                                                         | 25                                                                                | 25                                                                                 | 25                                                                                  | 25                                                                                  | 25                                                                                  |
| <b>r factors</b>                                                                  |                                                                                   |                                                                                    |                                                                                     |                                                                                     |                                                                                     |
| d(P-M)                                                                            | 2.2923                                                                            | 2.2703                                                                             | 2.2814 2.2883                                                                       | 2.2800                                                                              | 2.2817                                                                              |
| $\Sigma r_{\text{cov}}(\text{P-M})$                                               | 2.43                                                                              | 2.43                                                                               | 2.43                                                                                | 2.43                                                                                | 2.43                                                                                |
| <b>r(P-M)</b>                                                                     | <b>0.943</b>                                                                      | <b>0.934</b>                                                                       | <b>0.939 0.941</b>                                                                  | <b>0.938</b>                                                                        | <b>0.939</b>                                                                        |
| d(M-C10)                                                                          | 2.0770                                                                            | 2.0422                                                                             | 2.1056 2.0641                                                                       | 2.0789                                                                              | 2.0734                                                                              |
| $\Sigma r_{\text{cov}}(\text{M-C10})$                                             | 2.09                                                                              | 2.09                                                                               | 2.09                                                                                | 2.09                                                                                | 2.09                                                                                |
| <b>r(M-C10)</b>                                                                   | <b>0.994</b>                                                                      | <b>0.977</b>                                                                       | <b>1.007 0.987</b>                                                                  | <b>0.995</b>                                                                        | <b>0.992</b>                                                                        |
| <b>P-M-C10</b>                                                                    | 82.77                                                                             | 83.74                                                                              | 82.38 81.63                                                                         | 80.81                                                                               | 82.54                                                                               |
| <b>Bay angles</b>                                                                 |                                                                                   |                                                                                    |                                                                                     |                                                                                     |                                                                                     |
| M-C10-C5                                                                          | 118.91                                                                            | 118.81                                                                             | 118.09 122.34                                                                       | 120.81                                                                              | 119.78                                                                              |
| C5-C6-P                                                                           | 112.08                                                                            | 110.46                                                                             | 113.09 112.57                                                                       | 112.50                                                                              | 112.29                                                                              |
| <b>Out-of plane distortions</b>                                                   |                                                                                   |                                                                                    |                                                                                     |                                                                                     |                                                                                     |
| $\alpha(\text{C3-C6-P})$                                                          | 6.05                                                                              | 0.99                                                                               | 3.97 5.86                                                                           | 4.09                                                                                | 7.20                                                                                |
| $\alpha'(\text{C7-C10-M})$                                                        | 2.77                                                                              | 2.89                                                                               | 1.54 2.72                                                                           | 4.12                                                                                | 2.94                                                                                |

|                                       |              |                |              |              |              |              |              |
|---------------------------------------|--------------|----------------|--------------|--------------|--------------|--------------|--------------|
|                                       |              |                |              |              |              |              |              |
| Reference                             | 25           | 26             | 26           | 27           | 27           | 28           | 29           |
| <b>r factors</b>                      |              |                |              |              |              |              |              |
| d(P-M)                                | 2.2817       | 2.284(1)       | 2.2728       | 2.3498       | 2.3678       | 2.3433       | 2.330        |
| $\Sigma r_{\text{cov}}(\text{P-M})$   | 2.43         | 2.43           | 2.43         | 2.43         | 2.43         | 2.43         | 2.43         |
| <b>r(P-M)</b>                         | <b>0.939</b> | <b>0.940</b>   | <b>0.935</b> | <b>0.967</b> | <b>0.974</b> | <b>0.964</b> | <b>0.959</b> |
| d(M-C10)                              | 2.0639       | 2.070(4)       | 2.0518       | 2.0372       | 2.0798       | 2.0569       | 2.0313       |
| $\Sigma r_{\text{cov}}(\text{M-C10})$ | 2.09         | 2.09           | 2.09         | 2.09         | 2.09         | 2.09         | 2.09         |
| <b>r(M-C10)</b>                       | <b>0.987</b> | <b>0.990</b>   | <b>0.982</b> | <b>0.975</b> | <b>0.995</b> | <b>0.984</b> | <b>0.972</b> |
| <b>P-M-C10</b>                        | <b>80.86</b> | <b>84.4(1)</b> | 84.52        | <b>84.66</b> | <b>83.99</b> | 84.87        | 84.63        |
| <b>Bay angles</b>                     |              |                |              |              |              |              |              |
| M-C10-C5                              | 120.17       | 117.2(3)       | 118.19       | 118.36       | 117.84       | 118.89       | 118.78       |
| C5-C6-P                               | 111.61       | 114.1(3)       | 112.82       | 114.94       | 114.22       | 115.25       | 115.76       |
| <b>Out-of plane distortions</b>       |              |                |              |              |              |              |              |
| $\alpha$ (C3-C6-P)                    | 7.34         | 4.81           | 1.49         | 4.42         | 6.66         | 3.81         | 2.52         |
| $\alpha'$ (C7-C10-M)                  | 7.64         | 2.09           | 0.60         | 1.97         | 3.87         | 0.80         | 2.56         |

|                                                                                   |                                                                                   |                                                                                   |                                                                                    |                                                                                     |                                                                                     |                                                                                     |                                                                                     |
|-----------------------------------------------------------------------------------|-----------------------------------------------------------------------------------|-----------------------------------------------------------------------------------|------------------------------------------------------------------------------------|-------------------------------------------------------------------------------------|-------------------------------------------------------------------------------------|-------------------------------------------------------------------------------------|-------------------------------------------------------------------------------------|
| 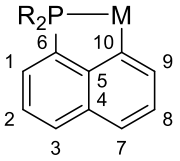 |  |  |  |  |  |  |  |
| Reference                                                                         | 30                                                                                | 30                                                                                | 30                                                                                 | 28                                                                                  | 31                                                                                  | 31                                                                                  | 31                                                                                  |
| <b>r factors</b>                                                                  |                                                                                   |                                                                                   |                                                                                    |                                                                                     |                                                                                     |                                                                                     |                                                                                     |
| d(P-M)                                                                            | 2.3161                                                                            | 2.3399                                                                            | 2.3534                                                                             | 2.4000                                                                              | 2.2880 2.2760                                                                       | 2.2860                                                                              | 2.2920                                                                              |
| $\Sigma r_{\text{cov}}(\text{P-M})$                                               | 2.43                                                                              | 2.43                                                                              | 2.43                                                                               | 2.43                                                                                | 2.43                                                                                | 2.43                                                                                | 2.43                                                                                |
| <b>r(P-M)</b>                                                                     | <b>0.953</b>                                                                      | <b>0.963</b>                                                                      | <b>0.968</b>                                                                       | <b>0.988</b>                                                                        | <b>0.941 0.937</b>                                                                  | <b>0.941</b>                                                                        | <b>0.943</b>                                                                        |
| d(M-C10)                                                                          | 2.1016                                                                            | 2.0849                                                                            | 2.0450                                                                             | 2.0370                                                                              | 2.0740 2.0710                                                                       | 2.0710                                                                              | 2.0580                                                                              |
| $\Sigma r_{\text{cov}}(\text{M-C10})$                                             | 2.09                                                                              | 2.09                                                                              | 2.09                                                                               | 2.09                                                                                | 2.09                                                                                | 2.09                                                                                | 2.09                                                                                |
| <b>r(M-C10)</b>                                                                   | <b>1.00</b>                                                                       | <b>0.997</b>                                                                      | <b>0.978</b>                                                                       | <b>0.975</b>                                                                        | <b>0.992 0.992</b>                                                                  | <b>0.991</b>                                                                        | <b>0.985</b>                                                                        |
| <b>P-M-C10</b>                                                                    | 83.36                                                                             | 82.86                                                                             | 84.35                                                                              | 84.15                                                                               | 83.88 83.51                                                                         | 83.85                                                                               | 83.89                                                                               |
| <b>Bay angles</b>                                                                 |                                                                                   |                                                                                   |                                                                                    |                                                                                     |                                                                                     |                                                                                     |                                                                                     |
| M-C10-C5                                                                          | 118.42                                                                            | 118.15                                                                            | 117.55                                                                             | 118.02                                                                              | 118.72 118.98                                                                       | 118.15                                                                              | 118.65                                                                              |
| C5-C6-P                                                                           | 114.92                                                                            | 113.81                                                                            | 114.03                                                                             | 114.65                                                                              | 114.26 113.53                                                                       | 113.58                                                                              | 113.87                                                                              |
| <b>Out-of plane distortions</b>                                                   |                                                                                   |                                                                                   |                                                                                    |                                                                                     |                                                                                     |                                                                                     |                                                                                     |
| $\alpha(\text{C3-C6-P})$                                                          | 3.11                                                                              | 9.21                                                                              | 6.75                                                                               | 5.23                                                                                | 4.70 6.43                                                                           | 5.84                                                                                | 4.82                                                                                |
| $\alpha'(\text{C7-C10-M})$                                                        | 4.29                                                                              | 4.54                                                                              | 1.60                                                                               | 4.47                                                                                | 1.51 1.82                                                                           | 2.03                                                                                | 1.39                                                                                |

| Reference                       | 31           | 32           | 33           | 33           | 34           | 34           | 35           |
|---------------------------------|--------------|--------------|--------------|--------------|--------------|--------------|--------------|
| <b>r factors</b>                |              |              |              |              |              |              |              |
| d(P-M)                          | 2.3050       | 2.2616       | 2.3058       | 2.2975       | 2.3380       | 2.3770       | 2.2864       |
| $\Sigma r_{cov}(P-M)$           | 2.43         | 2.43         | 2.43         | 2.43         | 2.43         | 2.43         | 2.43         |
| <b>r(P-M)</b>                   | <b>0.948</b> | <b>0.931</b> | <b>0.949</b> | <b>0.945</b> | <b>0.962</b> | <b>0.978</b> | <b>0.941</b> |
| d(M-C10)                        | 2.0640       | 2.0045       | 2.0599       | 2.0778       | 2.0970       | 2.1180       | 2.0429       |
| $\Sigma r_{cov}(M-C10)$         | 2.09         | 2.09         | 2.09         | 2.09         | 2.09         | 2.09         | 2.09         |
| <b>r(M-C10)</b>                 | <b>0.987</b> | <b>0.959</b> | <b>0.985</b> | <b>0.994</b> | <b>1.003</b> | <b>1.013</b> | <b>0.977</b> |
| <b>P-M-C10</b>                  | 84.29        | 84.13        | 84.88        | 84.33        | 83.00        | 84.28        | 85.08        |
| <b>Bay angles</b>               |              |              |              |              |              |              |              |
| M-C10-C5                        | 118.44       | 118.81       | 117.61       | 117.64       | 119.36       | 117.39       | 115.68       |
| C5-C6-P                         | 114.05       | 112.95       | 114.56       | 114.53       | 113.64       | 116.52       | 111.49       |
| <b>Out-of plane distortions</b> |              |              |              |              |              |              |              |
| $\alpha$ (C3-C6-P)              | 4.86         | 2.76         | 2.69         | 4.77         | 4.90         | 1.85         | 6.82         |
| $\alpha'$ (C7-C10-M)            | 1.68         | 5.33         | 0.95         | 3.41         | 1.59         | 5.55         | 7.17         |

|                                                                                   |                                                                                   |                                                                                    |
|-----------------------------------------------------------------------------------|-----------------------------------------------------------------------------------|------------------------------------------------------------------------------------|
| 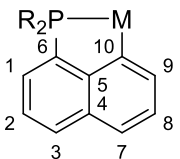 |  |  |
| Reference                                                                         | 35                                                                                | 36                                                                                 |
| <b>r factors</b>                                                                  |                                                                                   |                                                                                    |
| d(P-M)                                                                            | 2.3290                                                                            | 2.3700 2.3716                                                                      |
| $\Sigma r_{\text{cov}}(\text{P-M})$                                               | 2.43                                                                              | 2.43                                                                               |
| <b>r(P-M)</b>                                                                     | <b>0.958</b>                                                                      | <b>0.975 0.976</b>                                                                 |
| d(M-C10)                                                                          | 2.1001                                                                            | 2.0933 2.0890                                                                      |
| $\Sigma r_{\text{cov}}(\text{M-C10})$                                             | 2.09                                                                              | 2.09                                                                               |
| <b>r(M-C10)</b>                                                                   | <b>1.005</b>                                                                      | <b>1.00 0.999</b>                                                                  |
| <b>P-M-C10</b>                                                                    | 83.84                                                                             | 83.51 83.22                                                                        |
| <b>Bay angles</b>                                                                 |                                                                                   |                                                                                    |
| M-C10-C5                                                                          | 116.12                                                                            | 115.69 115.80                                                                      |
| C5-C6-P                                                                           | 113.16                                                                            | 112.93 112.72                                                                      |
| <b>Out-of plane distortions</b>                                                   |                                                                                   |                                                                                    |
| $\alpha(\text{C3-C6-P})$                                                          | 0.86                                                                              | 5.73 9.08                                                                          |
| $\alpha'(\text{C7-C10-M})$                                                        | 1.90                                                                              | 2.98 1.63                                                                          |

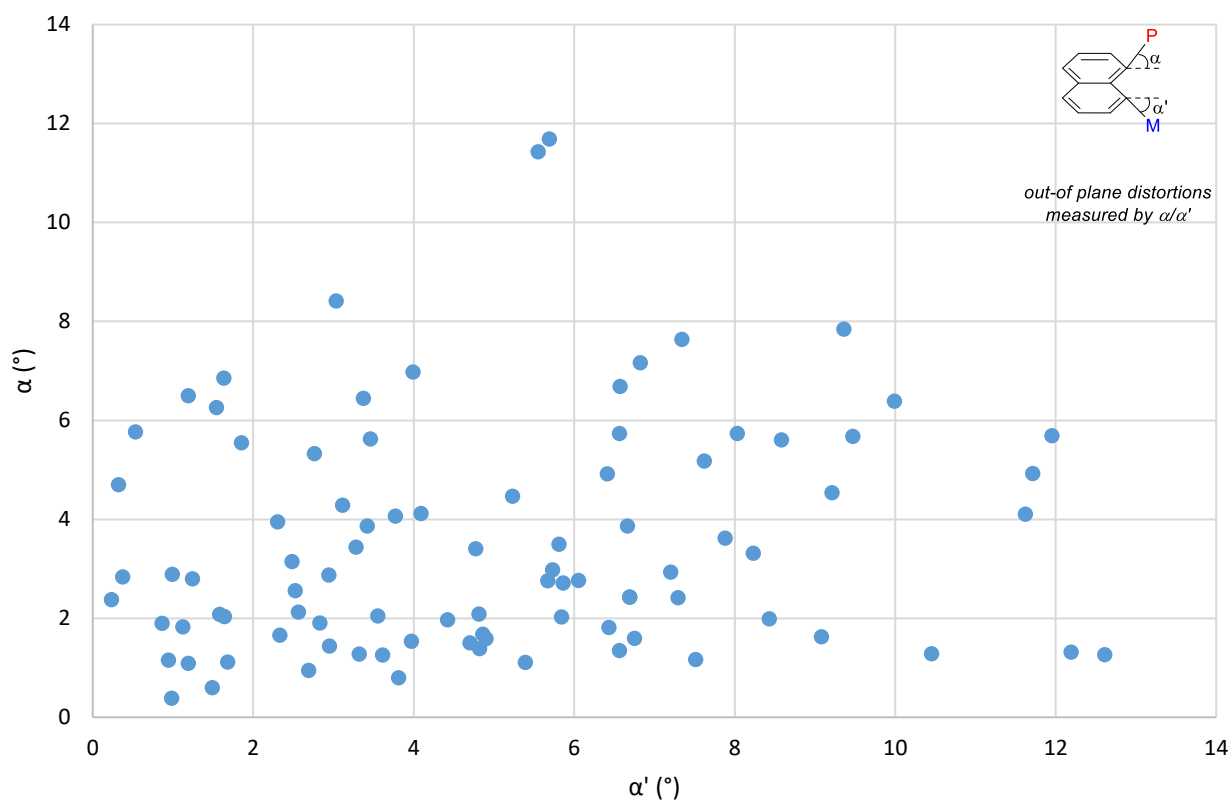

**Chart S1.** Plot of the out-of-plane distortion angle  $\alpha$  against the out-of-plane distortion angle  $\alpha'$ .

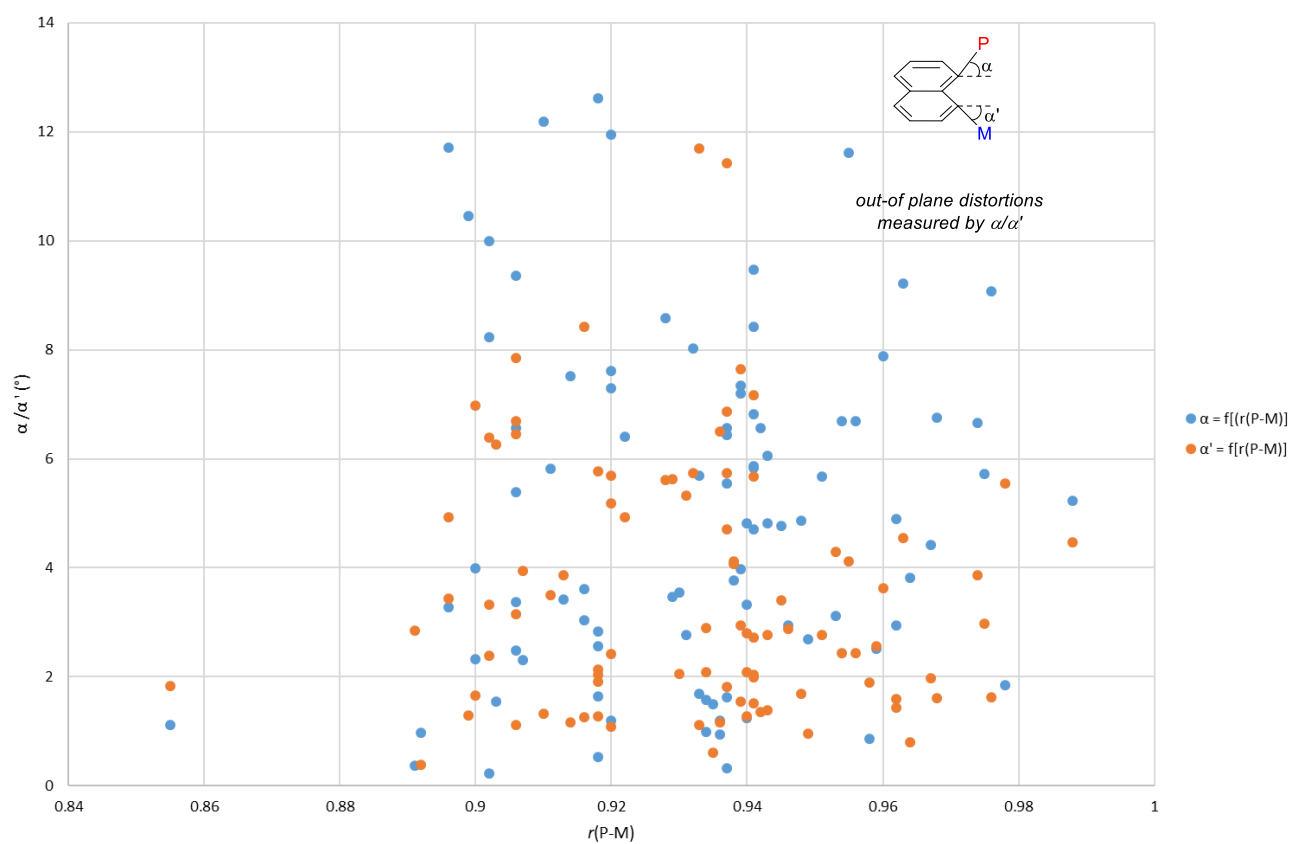

**Chart S2.** Plot of the out-of plane distortion angle  $\alpha$  against the  $r(P-M)$  factor (in blue) and plot of the out-of plane distortion angle  $\alpha'$  against the  $r(P-M)$  factor (in orange).



## References

1. R. Sun, T. Wang, S. Zhang, X. Chu, and B. Zhu, *RSC Adv.*, 2017, **7**, 17063.
2. S. E. Kabir, F. Ahmed, S. Ghosh, M. R. Hassan, M. S. Islam, A. Sharmin, D. A. Tocher, D. T. Haworth, S. V. Lindeman, T. A. Siddiquee, D. W. Bennett, and K. I. Hardcastle, *J. Organomet. Chem.*, 2008, **693**, 2657.
3. F. H. Carre, *Cryst. Struct. Commun.*, 1982, **11**, 1009.
4. R. Beck, H. Sun, D. Guan and X. Li, *Acta Cryst.*, 2009, **E65**, m71.
5. R. Beck, T. Zheng, H. Sun, X. Li, U. Flörke, and H. F. Klein, *J. Organomet. Chem.*, 2008, **693**, 3471-3478.
6. R. Sun, X. Chu, S. Zhang, T. Li, Z. Wang, and B. Zhu, *Eur. J. Inorg. Chem.*, 2017, 3174-3183.
7. A. Grabulosa, J. Granell, and M. Font-Bardia, *J. Organomet. Chem.*, 2019, **896**, 51-58.
8. L. Rafols, D. Josa, D. Aguilà, L. A. Barrios, O. Roubeau, J. Cirera, V. Soto-Cerrato, R. Pérez-Tomás, M. Martínez, A. Grabulosa, and P. Gamez, *Inorg. Chem.*, 2021, **60**, 7974-7990.
9. H. F. Klein, R. Beck, U. Flörke, and H. J. Haupt, *Eur. J. Inorg. Chem.*, 2003, 1380-1387.
10. S. Furan, E. Lork, S. Mebs, E. Hupf, and J. Beckmann, *Z. Anorg. Allg. Chem.*, 2020, **646**, 856-865.
11. S. Zhang, X. Chu, T. Li, Z. Wang, and B. Zhu, *ACS Omega*, 2018, **3**, 4522-4533.
12. C. H. Lin, Y. Chi, M. W. Chung, Y. J. Chen, K. W. Wang, G. H. Lee, P. T. Chou, W. Y. Hung, and H. C. Chiu, *Dalton Trans.*, 2011, **40**, 1132-1143.
13. B. S. Du, C. H. Lin, Y. Chi, J. Y. Hung, M. W. Chung, T. Y. Lin, G. H. Lee, K. T. Wong, P. T. Chou, W. Y. Hung, and H. C. Chiu, *Inorg. Chem.*, 2010, **49**, 8713-8723.
14. S. Furan, M. Vogt, K. Winkels, E. Lork, S. Mebs, E. Hupf, and J. Beckmann, *Organometallics*, 2021, **40**, 1284-1295.
15. T. Mizuta, N. Tanaka, Y. Iwakuni, K. Kubo, and K. Miyoshi, *Organometallics*, 2009, **28**, 2808-2817.
16. M. L. Scheuermann, D. W. Boyce, K. A. Grice, W. Kaminsky, S. Stoll, W. B. Tolman, O. Swang, and K. I. Goldberg, *Angew. Chem. Int. Ed.*, 2014, **53**, 6492-6495.
17. W. L. Davis and A. Muller *Acta Cryst.*, 2012, **E68**, m1565-m1566
18. G. D. Frey, C. P. Reisinger, E. Herdtweck, and W. A. Herrmann, *J. Organomet. Chem.*, 2005, **690**, 3193-3201.
19. M. E. Light, S. Fiddy, J. Evans, *CSD Communication (Private Communication)*, 2016, CCDC 1476162.
20. J. Hu, J. H. K. Yip, D. L. Ma, K. Y. Wong, and W. H. Chung, *Organometallics*, 2009, **28**, 51-59.
21. A. S. Ionkin, W. J. Marshall, and B. M. Fish, *Organometallics*, 2006, **25**, 1461-1471.
22. T. Mizuta, Y. Iwakuni, T. Nakazono, K. Kubo, and K. Miyoshi, *J. Organomet. Chem.*, 2007, **692**, 184-193.
23. K. A. Grice, W. Kaminsky, and K. I. Goldberg, *Inorg. Chim. Acta*, 2011, **369**, 76-81.
24. I. S. Dubinsky-Davidchik, I. Goldberg, A. Vigalok, and A. N. Vedernikov, *Chem. Commun.*, 2013, **49**, 3446-3448.
25. J. Hu, R. Lin, J. H. K. Yip, K. Y. Wong, D. L. Ma, and J. J. Vittal, *Organometallics*, 2007, **26**, 6533-6543.
26. J. Guenther, S. Mallet-Ladeira, L. Estevez, K. Miqueu, A. Amgoune, and D. Bourissou, *J. Am. Chem. Soc.*, 2014, **136**, 1778-1781.
27. F. Rekhroukh, L. Estevez, S. Mallet-Ladeira, K. Miqueu, A. Amgoune, and D. Bourissou, *J. Am. Chem. Soc.*, 2016, **138**, 11920-11929.
28. F. Rekhroukh, C. Blons, L. Estevez, S. Mallet-Ladeira, K. Miqueu, A. Amgoune, and D. Bourissou, *Chem. Sci.*, 2017, **8**, 4539-4545.
29. H. Kawai, W. J. Wolf, A. G. DiPasquale, M. S. Winston, and F. D. Toste, *J. Am. Chem. Soc.*, 2016, **138**, 587-593.

30. F. Rekhroukh, R. Brousses, A. Amgoune, and D. Bourissou, *Angew. Chem. Int. Ed.*, 2015, **54**, 1266-1269.
31. A. Pujol, M. Lafage, F. Rekhroukh, N. Saffon-Merceron, A. Amgoune, D. Bourissou, N. Nebra, M. Fustier-Boutignon, and N. Mézailles, *Angew. Chem. Int. Ed.*, 2017, **56**, 12264-12267.
32. C. Blons, S. Mallet-Ladeira, A. Amgoune, and D. Bourissou, *Angew. Chem. Int. Ed.*, 2018, **57**, 11732-11736.
33. J. Rodriguez, G. Szaloki, E. D. Sosa Carrizo, N. Saffon-Merceron, K. Miqueu, and D. Bourissou, *Angew. Chem. Int. Ed.*, 2020, **59**, 1511-1515.
34. J. Rodriguez, M. S. M. Holmsen, Y. García-Rodeja, E. D. Sosa Carrizo, P. Lavedan, S. Mallet-Ladeira, K. Miqueu, and D. Bourissou, *J. Am. Chem. Soc.*, 2021, **143**, 11568-11581.
35. T. G. Do, E. Hupf, E. Lork, J. F. Kögel, F. Mohr, A. Brown, R. Toyoda, R. Sakamoto, H. Nishihara, S. Mebs, and J. Beckmann, *Eur. J. Inorg. Chem.*, 2019, 647-659.
36. E. Hupf, E. Lork, S. Mebs, and J. Beckmann, *Inorg. Chem.*, 2015, **54**, 1847-1859.
